# Supplementary material for: Air and waterborne microbiome of a pharmaceutical plant provide insights on spatiotemporal variations and community resilience after disturbance
Source: PubMed Central journal article supplement (PMC6171249; doi:10.1186/s12866-018-1267-8), 2018-10-03
Supplement: 12866_2018_1267_MOESM1_ESM.pdf [file 12866_2018_1267_MOESM1_ESM.pdf]

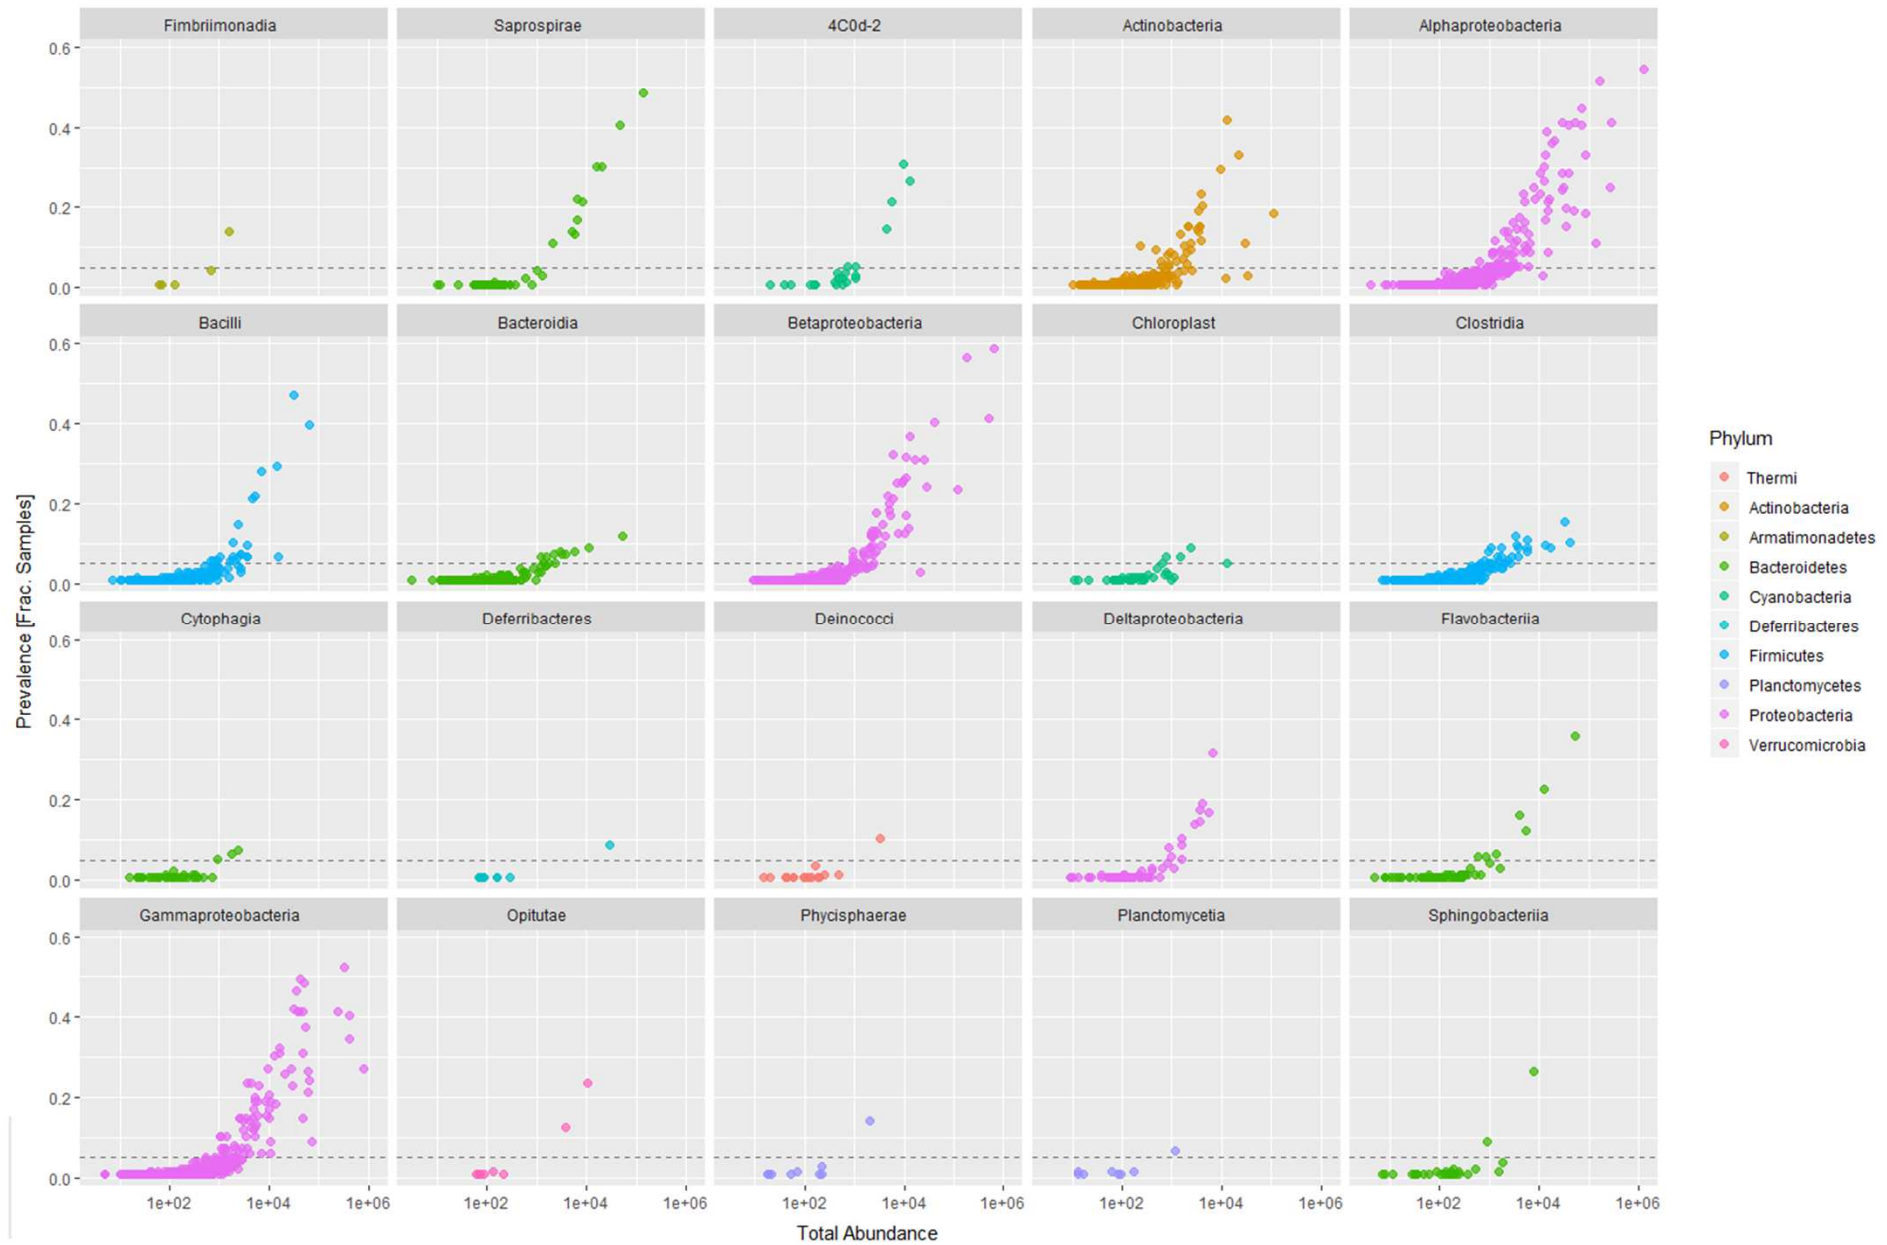

**Supplementary Figure 1a** - Prevalence of OTUs in water microbiome samples divided by order, expressed as fraction of samples in which an OTU classified within a given order was found. Values on the x-axis represent the absolute number of reads; dots are coloured according to the phylum. Only orders with at least one OTU above the arbitrary threshold of 5% of prevalence are shown.

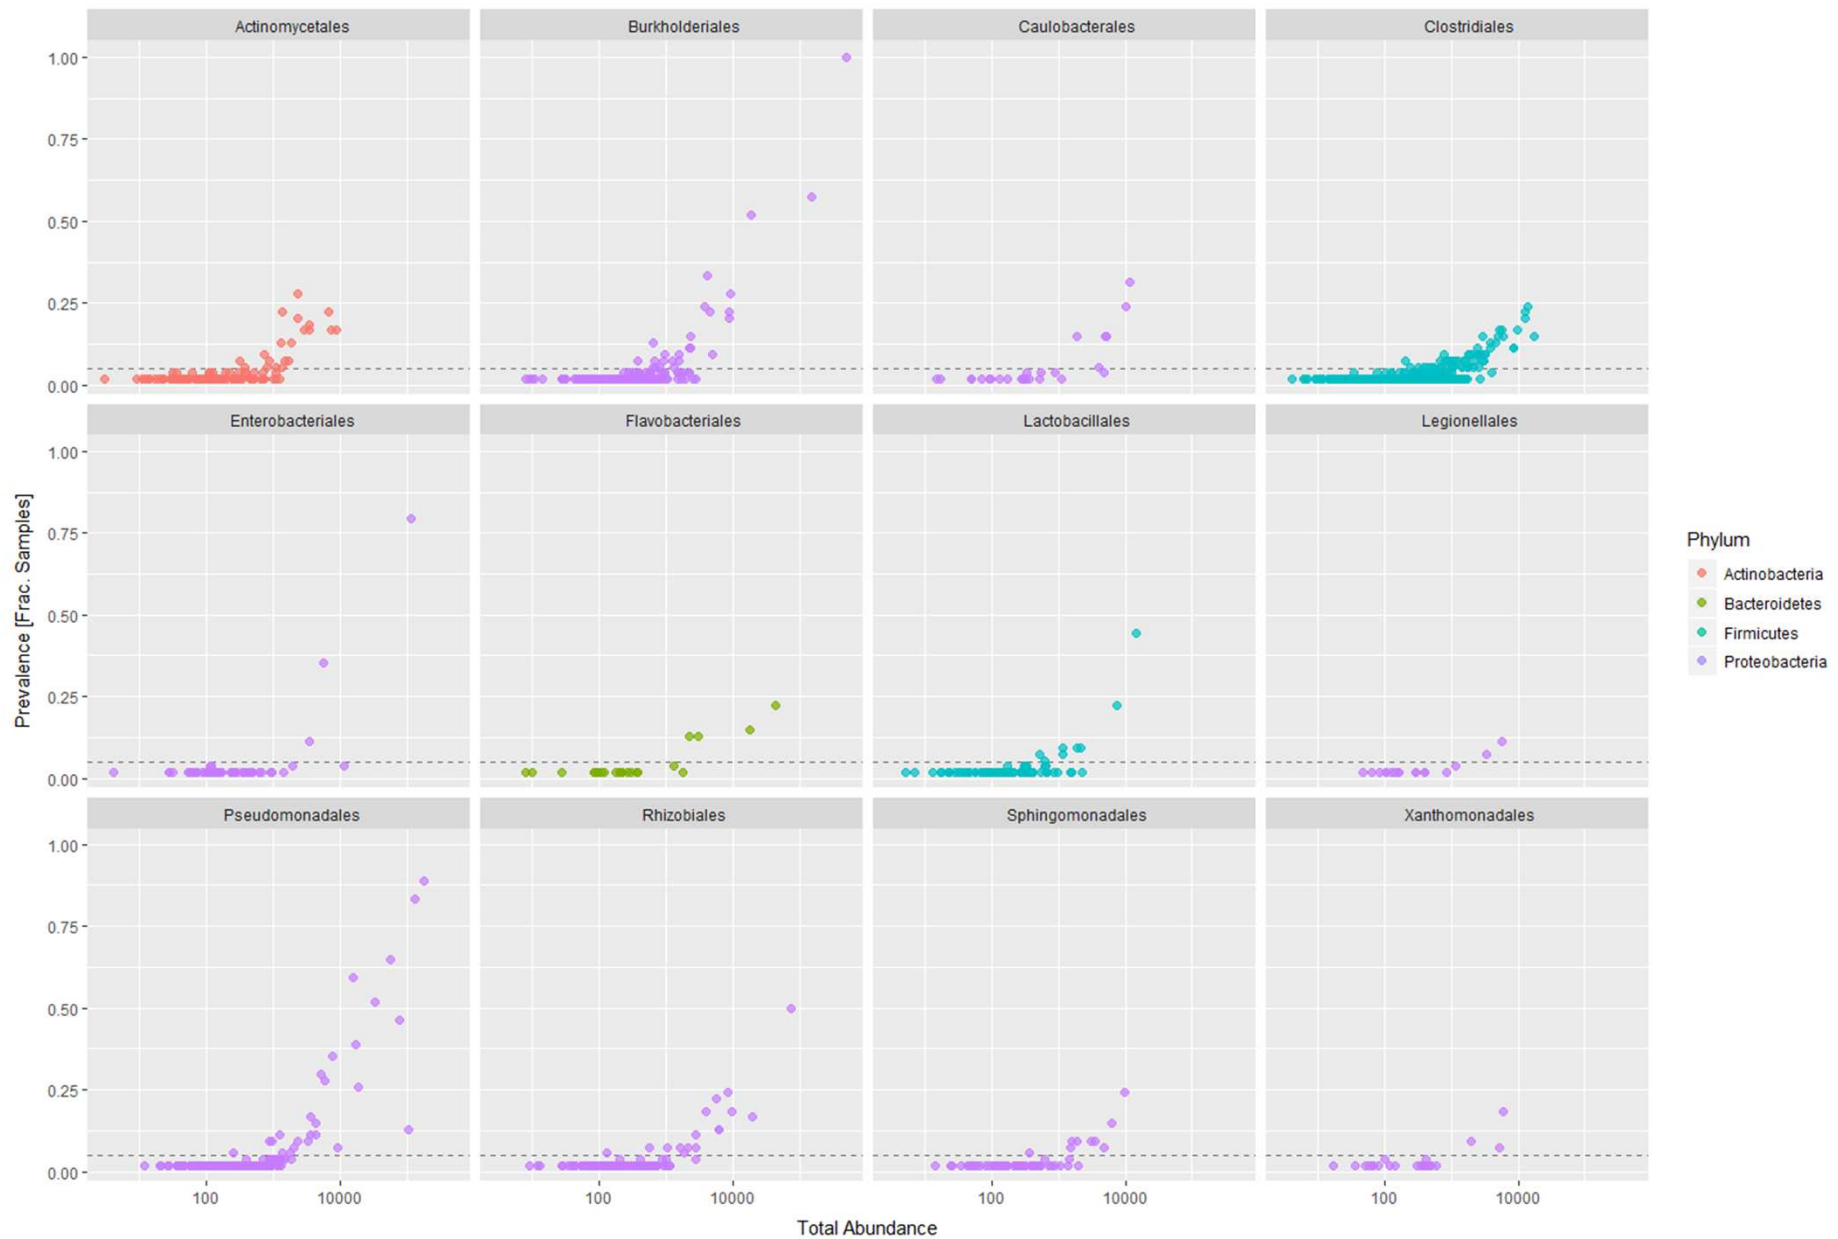

**Additional file 1: Figure S1b**-Prevalence of OTUs in air microbiome samples divided by class, expressed as fraction of samples in which an OTU classified within a given class was found. Values on the x-axis represent the absolute number of reads; dots are coloured according to the phylum. Only classes with at least one OTU above the arbitrary threshold of 5% of prevalence are shown.
